# Supplementary material
Source: PubMed Central journal article supplement (PMC3466390)
Supplement: NIHMS404514-supplement-01.pdf [file NIHMS404514-supplement-01.pdf]

## Supplementary Material

### Arginine-Rich Self-Assembling Peptides as Potent Antibacterial Gels

Ana Salomé Veiga<sup>a,b</sup>, Chomdao Sinthuvanich<sup>a,c</sup>, Diana Gaspar<sup>b</sup>, Henri G. Franquelim<sup>b</sup>, Miguel Castanho<sup>b</sup>, and Joel P. Schneider<sup>a,\*</sup>

a – Chemical Biology Lab, National Cancer Institute, Frederick, MD, 21702

b – Instituto de Medicina Molecular, Faculdade de Medicina da Universidade de Lisboa, Av. Prof. Egas Moniz, 1649-028 Lisbon, Portugal

c – Chemistry and Biochemistry Department, University of Delaware, Newark, DE 19716

\* Corresponding author: Dr. J. P. Schneider, Chemical Biology Lab, National Cancer Institute, Frederick, MD, 21702; joel.schneider@nih.gov

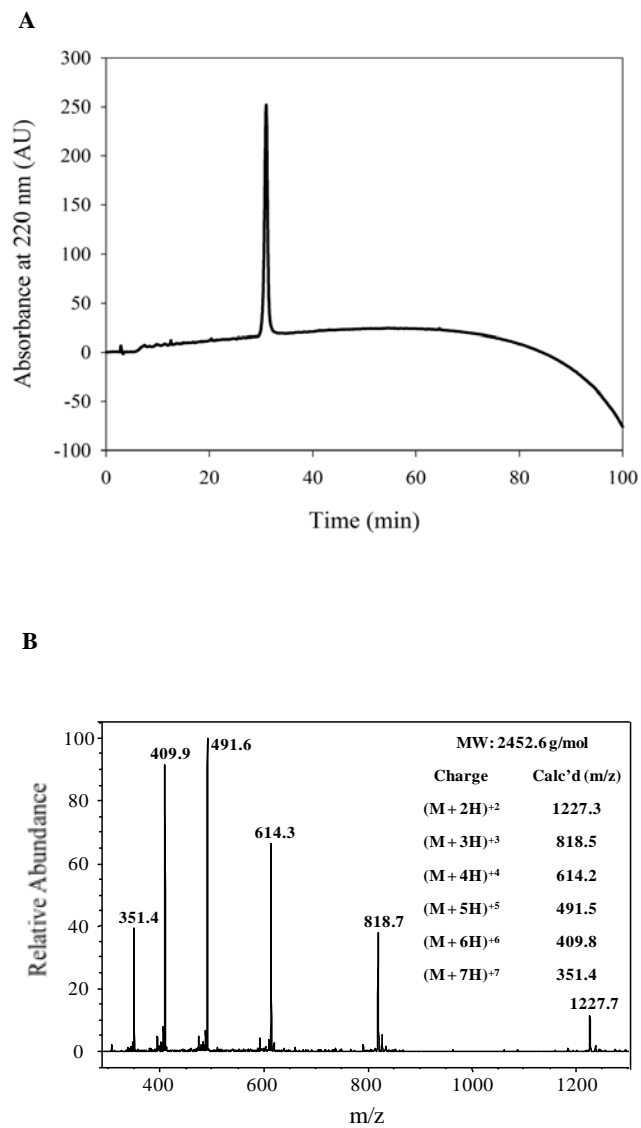

**Figure S1** – (A) Analytical HPLC (Vydac C18) of purified PEP8R. 0% to 100% B over 100 minutes. (B) ESI (+) mass spectrum of purified PEP8R.

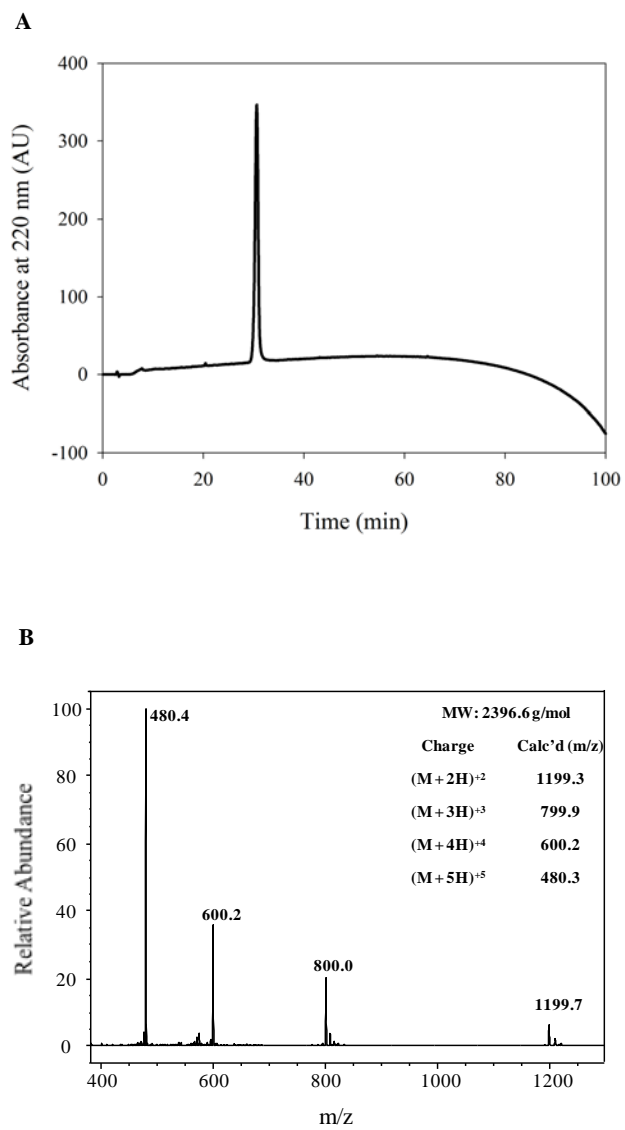

**Figure S2** – (A) Analytical HPLC (Vydac C18) of purified PEP6R. 0% to 100% B over 100 minutes. (B) ESI (+) mass spectrum of purified PEP6R

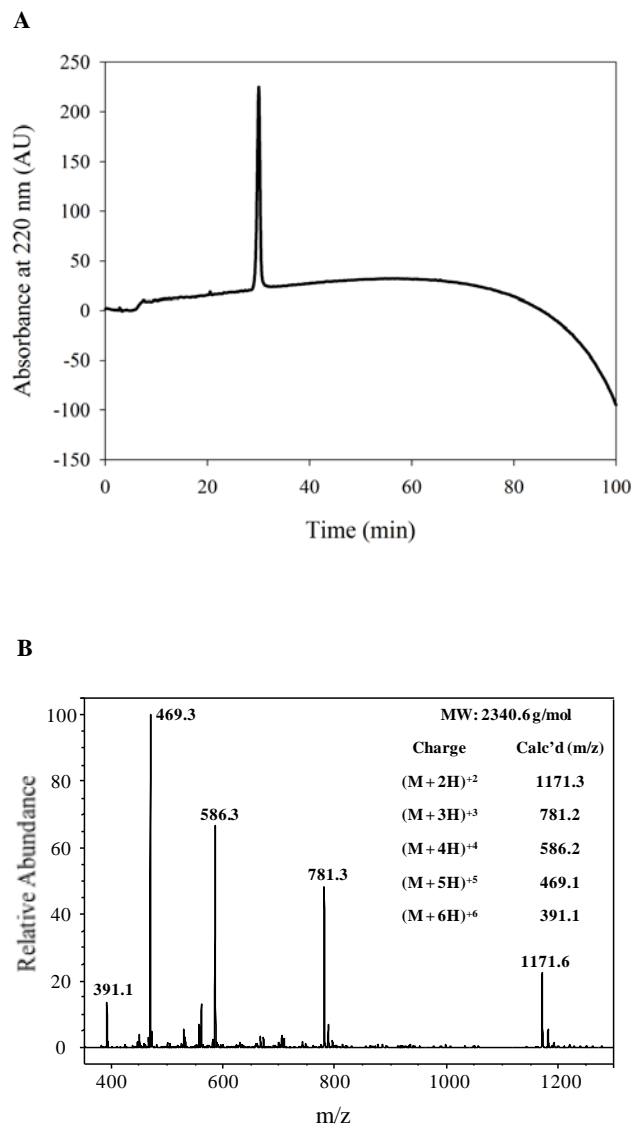

**Figure S3** – (A) Analytical HPLC (Vydac C18) of purified PEP4R. 0% to 100% B over 100 minutes. (B) ESI (+) mass spectrum of purified PEP4R.

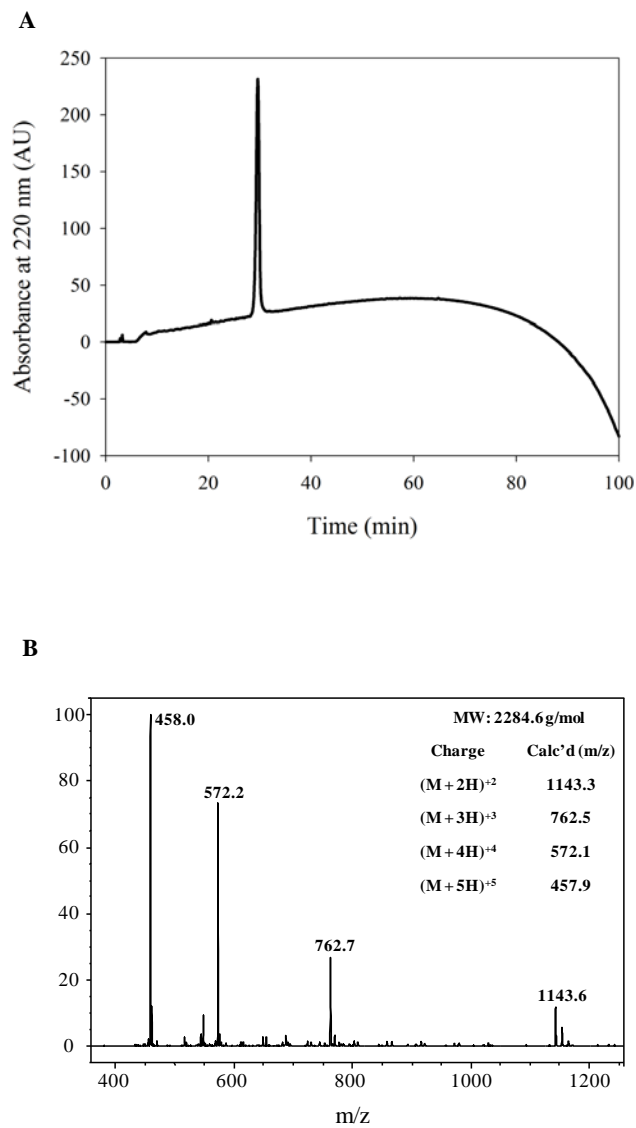

**Figure S4** – (A) Analytical HPLC (Vydac C18) of purified PEP2R. 0% to 100% B over 100 minutes. (B) ESI (+) mass spectrum of purified PEP2R.

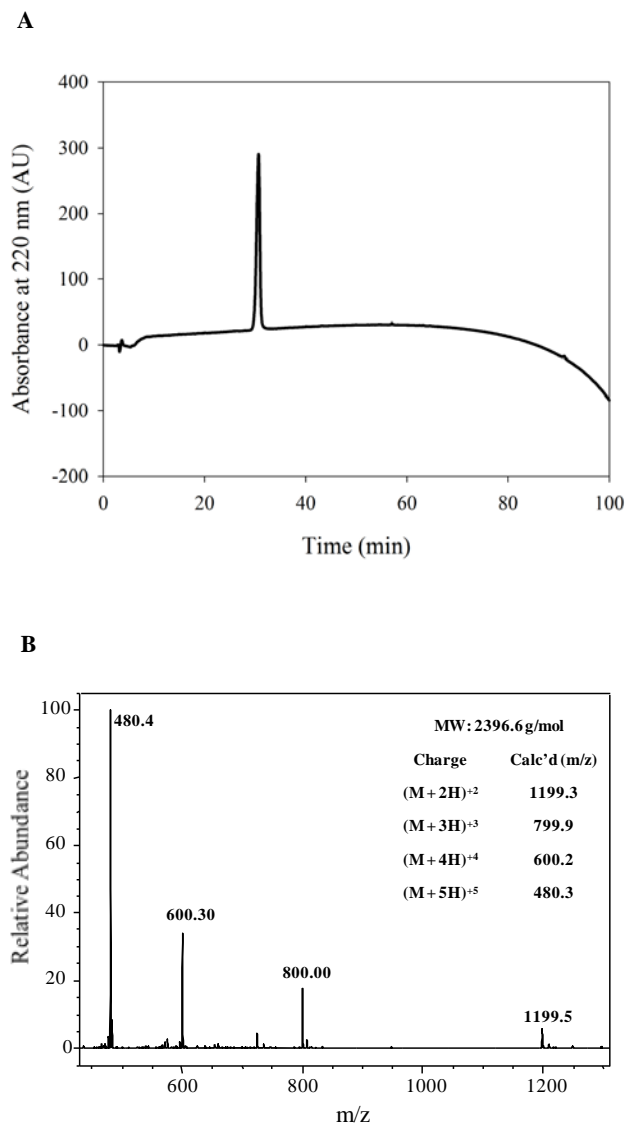

**Figure S5** – (A) Analytical HPLC (Vydac C18) of purified D-PEP6R. 0% to 100% B over 100 minutes. (B) ESI (+) mass spectrum of purified D-PEP6R.

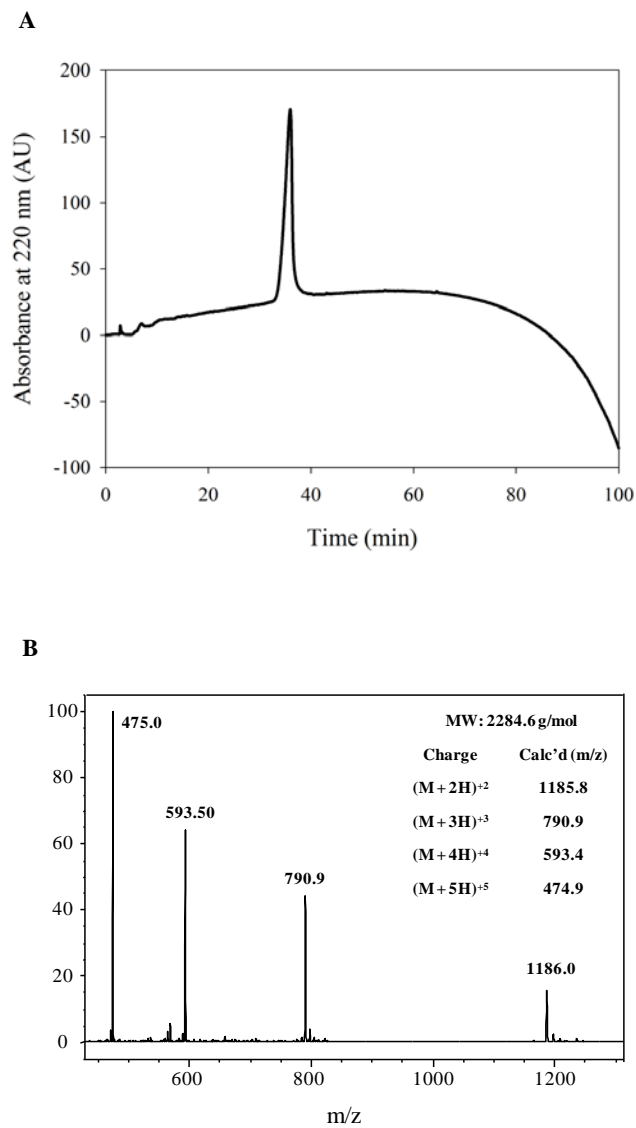

**Figure S6** – (A) Analytical HPLC (Vydac C18) of purified PEP6RE. 0% to 100% B over 100 minutes. (B) ESI (+) mass spectrum of purified PEP6RE.

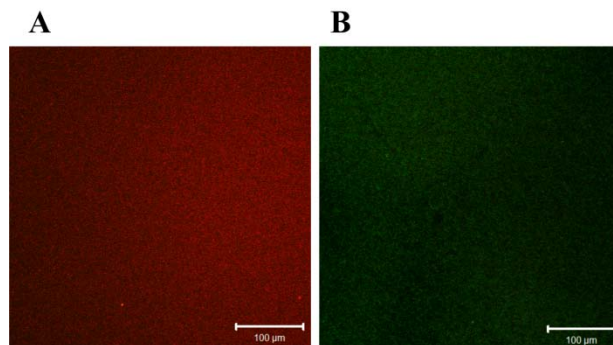

**Figure S7** - LSCM xy projection taken of  $10^5$  CFU/dm<sup>2</sup> *P. aeruginosa* incubated on (A) 2 wt% PEP6R hydrogels and (B) a borosilicate control surface, after 24 h incubation. Green and red fluorescence denotes, respectively, live and dead cells with compromised membranes. (Scales bars: 100 μm)



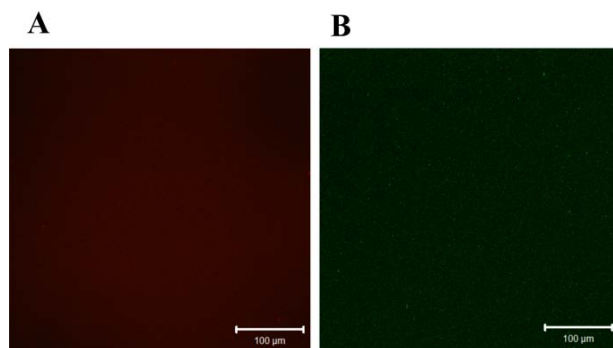

**Figure S8** - LSCM xy projection taken of  $10^5$  CFU/dm<sup>2</sup> *P. aeruginosa* incubated on (A) 2 wt% PEP6R hydrogels and (B) a borosilicate control surface, after 2 h incubation. Green and red fluorescence denotes, respectively, live and dead cells with compromised membranes. (Scales bars: 100  $\mu$ m)

### Soluble peptide antibacterial activity

PEP6R hydrogels were prepared in separate wells of 96-well tissue cultured-treated polystyrene plates at two different weight percentages (0.5 and 2 wt%) as described before. After the overnight equilibration, the BTP buffer was removed from the top of the hydrogels. Next 100  $\mu\text{L}$  of TSB was added to the surface of the gels and incubated for 2 h at 37°C. After the 2 h the TSB supernatant was removed from the top of the gels and placed on different wells of 96-wells polypropylene plates (Costar 3879). An *E. coli* (ATCC 25922) solution of  $10^6$  CFU/mL was prepared as described before. A 1  $\mu\text{L}$  aliquot of the bacterial stock solution was introduced to the 100  $\mu\text{L}$  of TSB supernatant resulting in a final bacterial concentration of  $10^4$  CFU/mL. Bacteria were incubated for 24 h on the TSB supernatant, as well as a control at 37°C. The following day, 150  $\mu\text{L}$  of bacteria-free TSB was added to remove the assay solution for measurement. Bacterial growth was monitored by measuring the  $\text{OD}_{625\text{nm}}$  of the solution. Corrected  $\text{OD}_{625\text{nm}}$  were calculated to account for dilution and to normalize the scattering for the bacterial strain.<sup>19</sup> The assay was performed in triplicate. Antibacterial activity is represented as percent non-viable bacteria, where % non-viable bacteria =  $[1 - (\text{OD}_{625\text{ surface}}/\text{OD}_{625\text{ control}})] \times 100$ .

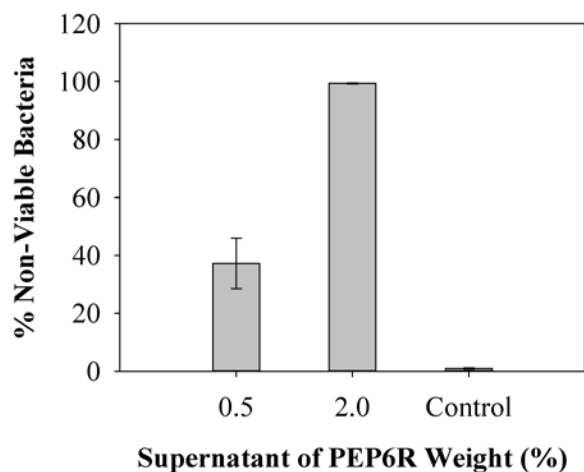

**Figure S9** - Antibacterial activity of hydrogel TSB supernatant against *E. coli* after 24 h incubation at 37°C. Percent non-viable bacteria is reported for 0.5 and 2 wt% hydrogels supernatant (n=3).

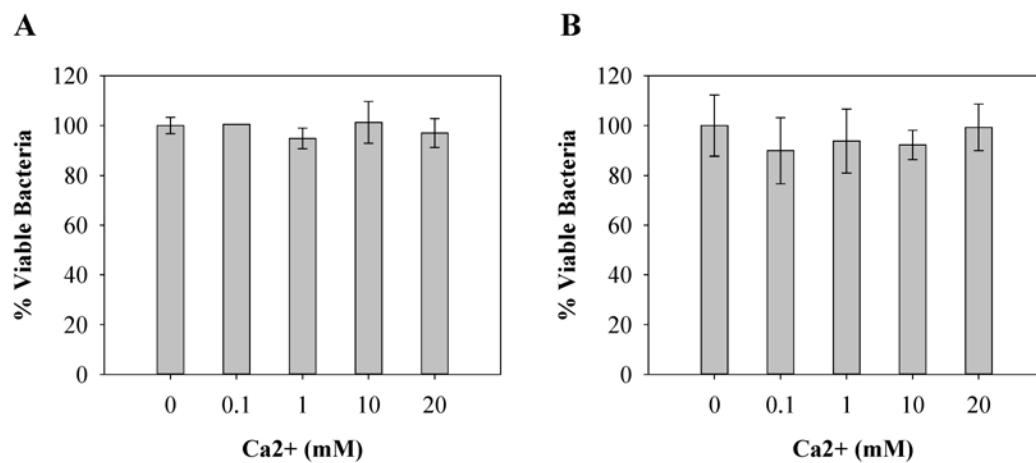

**Figure S10** – Viability of *E. coli* (A) and *S. aureus* (B) on TCTP control surface in the presence of Ca<sup>2+</sup>, after 24 h incubation at 37°C (n=3).
